# Supplementary material for: High-resolution imaging of protein secretion at the single-cell level using plasmon-enhanced FluoroDOT assay
Source: PubMed Central journal article supplement — Cell Rep Methods. 2022 Aug 5;2(8):100267. doi: 10.1016/j.crmeth.2022.100267 (PMC9421537; doi:10.1016/j.crmeth.2022.100267), 2022-08-05
Supplement: mmc1.pdf [file mmc1.pdf]

**Cell Reports Methods, Volume 2**

**Supplemental information**

**High-resolution imaging of protein  
secretion at the single-cell level  
using plasmon-enhanced FluoroDOT assay**

**Anushree Seth, Ekansh Mittal, Jingyi Luan, Samhitha Kolla, Monty B. Mazer, Hemant Joshi, Rohit Gupta, Priya Rathi, Zheyu Wang, Jeremiah J. Morrissey, Joel D. Ernst, Cynthia Portal-Celhay, Sharon Celeste Morley, Jennifer A. Philips, and Srikanth Singamaneni**

## Supplementary Information

### High-Resolution Imaging of Protein Secretion at Single-Cell Level using Plasmon-enhanced FluoroDOT Assay

#### AUTHORS

Anushree Seth<sup>1,2</sup>, Ekansh Mittal<sup>3,4</sup>, Jingyi Luan<sup>1</sup>, Samhitha Kolla<sup>1</sup>, Monty B. Mazer<sup>5</sup>, Hemant Joshi<sup>6,7</sup>, Rohit Gupta<sup>1</sup>, Priya Rathi<sup>1</sup>, Zheyu Wang<sup>1</sup>, Jeremiah J. Morrissey<sup>5,10</sup>, Joel D. Ernst<sup>8</sup>, Cynthia Portal-Celhay<sup>9</sup>, Sharon Celeste Morley<sup>5,6</sup>, Jennifer A. Philips<sup>3,4\*</sup>, Srikanth Singamaneni<sup>1,10,11 \*</sup>

## Supplemental Items

**Table S1:** Characteristic features of ELISpot/FluoroSPOT and FluoroDOT assays. Related to Figure 1.

|                                                                                      | <b>ELISpot/ FluoroSPOT Assay</b>                              | <b>FluoroDOT Assay</b>                                                                                                                                      |
|--------------------------------------------------------------------------------------|---------------------------------------------------------------|-------------------------------------------------------------------------------------------------------------------------------------------------------------|
| <b>Image Readout</b>                                                                 | Low resolution analog signal:<br>Spots                        | High resolution digital signal:<br>Clusters of dots                                                                                                         |
| <b>Signal Amplification Approach</b>                                                 | Extended incubation and analyte perfusion                     | Plasmon-enhanced fluorescence                                                                                                                               |
| <b>Spatial information of Secretion (cell shape/directional/polarized secretion)</b> | Lost in 3D membrane                                           | Intact on glass bottom substrate                                                                                                                            |
| <b>Information at early time-points</b>                                              | Not available as requires extended duration of incubation     | Available and can detect secretion as soon as it starts (within an hour)                                                                                    |
| <b>Information from doublets/dividing cells</b>                                      | Not available: Doublets counted as single large spot          | Available: Can resolve doublets/dividing cells                                                                                                              |
| <b>Sub-cellular information correlation with secretion</b>                           | Not feasible due to cells getting washed off during the assay | Cells can be fixed, stained, and imaged for revealing sub-cellular information (e.g., nuclear staining, fluorescent protein encoded intracellular bacteria) |
| <b>Image Readout Device</b>                                                          | ELISpot/FluoroSPOT Reader (Less readily available)            | Epi-fluorescence microscope (More readily available)                                                                                                        |
| <b>Quantification of Secreting Cells</b>                                             | Possible by counting number of Spots                          | Possible by counting number of Clusters                                                                                                                     |

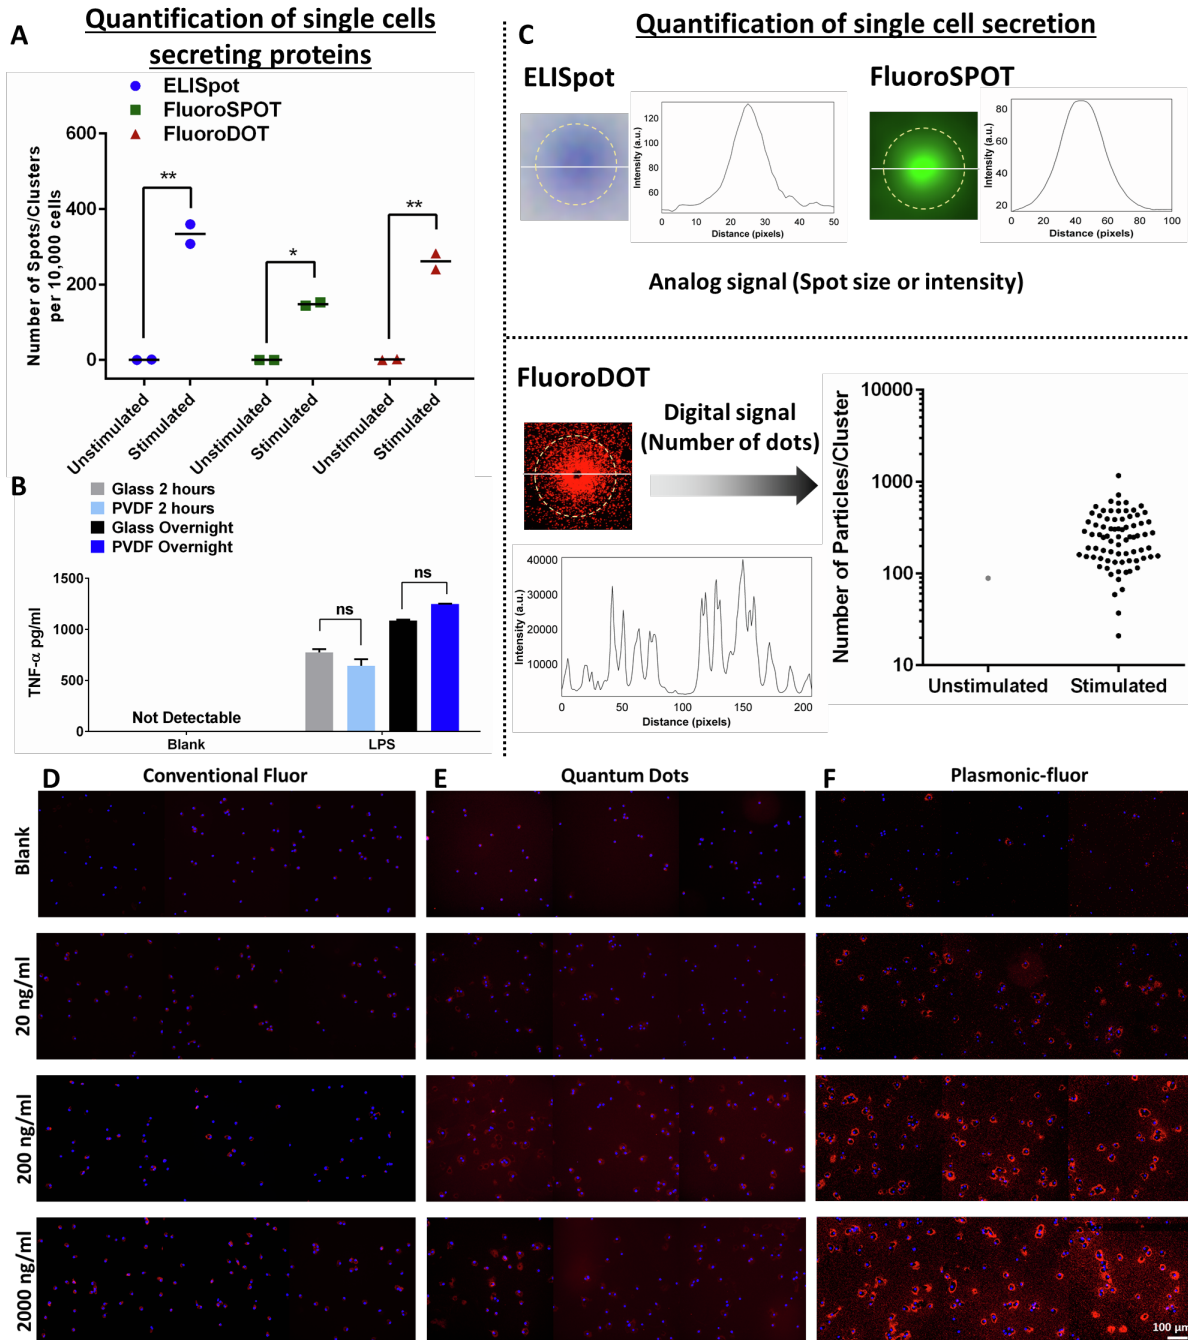

**Figure S1: Comparison of FluoroDOT assay with conventional assays and labels. Related to Figure 1.** A) Quantification of single cells secreting proteins using ELISpot, FluoroSPOT and FluoroDOT assays, 2-way ANOVA with Sidak's multiple comparison test. ELISpot \*\*  $p=0.0013$ , FluoroSPOT \* $p=0.0146$ , FluoroDOT \*\* $p=0.0028$ . B) Comparison of the amount of TNF $\alpha$  secreted on different substrates. C) Demonstration of representative analog signal of ELISpot and FluoroSPOT assays and digital signal of FluoroDOT assay. Yellow dotted line indicates the spot. Line-scan (indicated by white line) was performed to quantify the intensities using ImageJ. JAWS II DCs were treated with 200 and 2000 ng/ml lipopolysaccharide (LPS). Cy5/DAPI merged epifluorescence microscopy images of protein secretion using, D) conventional fluor (Cy5), E) quantum dot 655, and F) Cy5-plasmonic-fluor. Each panel contains 3 representative 20x images stitched together. Scale bar: 100  $\mu\text{m}$ .

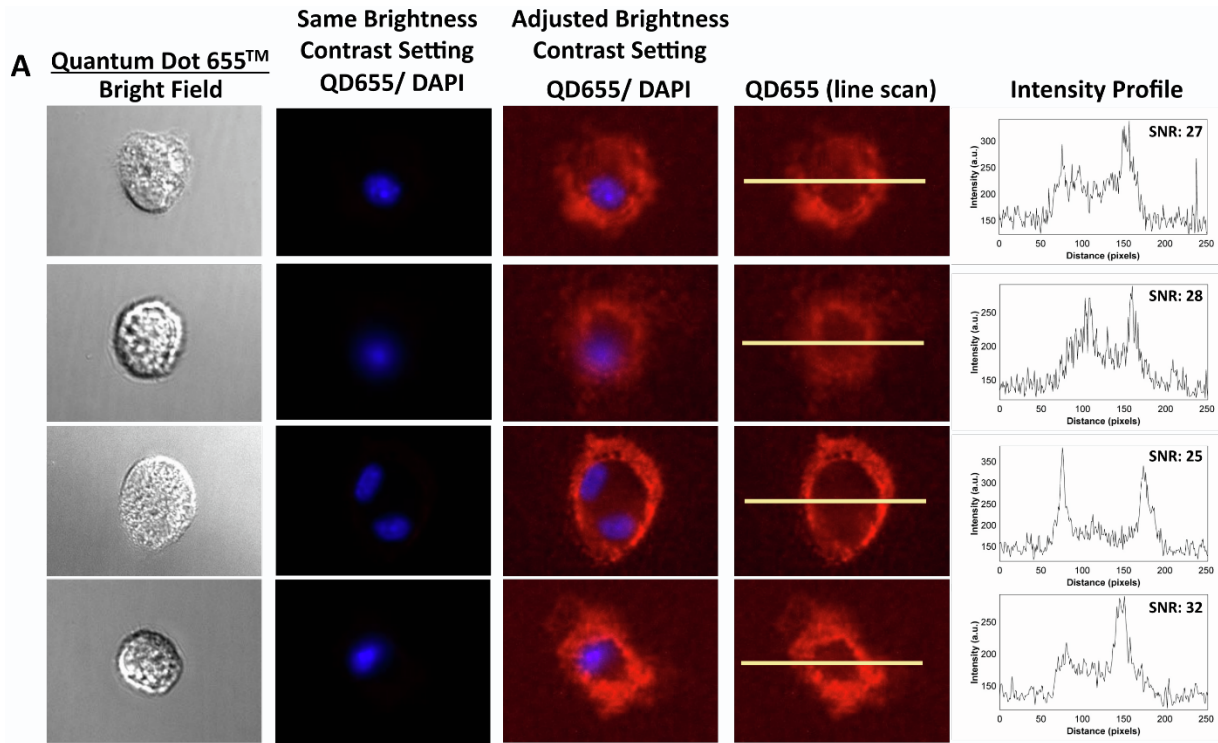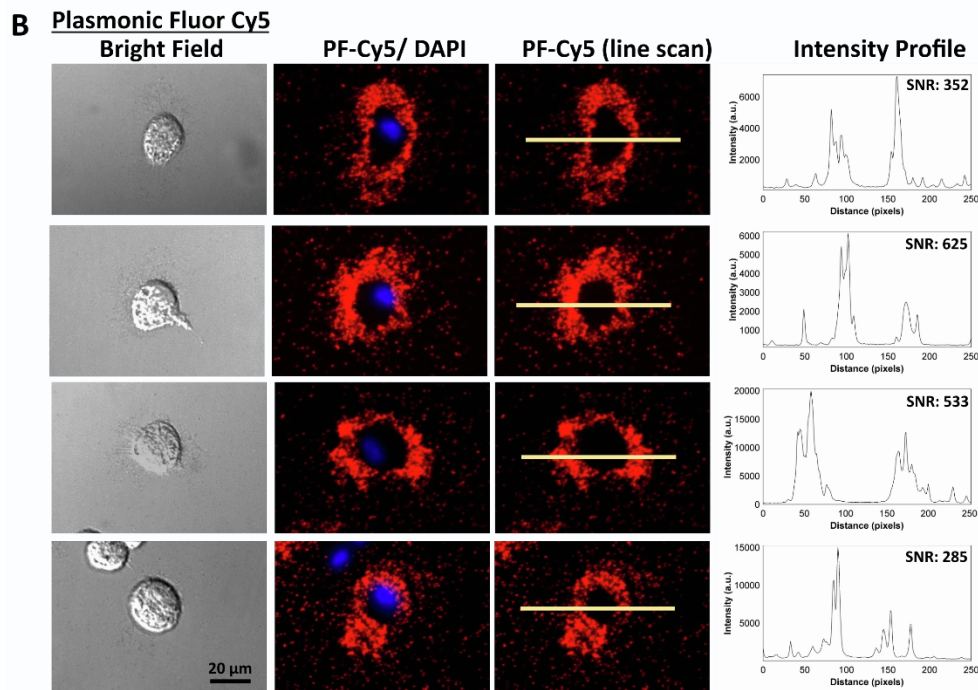

**Figure S2: Comparison of signal-to-noise ratio of quantum dots and plasmonic-fluor. Related to Figure 1.** JAWS II DCs were treated with 200 ng/ml lipopolysaccharide (LPS) and bright field images (left panel), Cy5/DAPI merged images (middle panel) of a single cell secreting TNF- $\alpha$ , representative line-scans and corresponding Signal-to-noise ratio (SNR) (right panel) visualized using A) quantum dot 655 (images with same and adjusted brightness contrast) and B) Cy5-plasmonic-fluor. LED (XCITE 110 LED Lamp) was used a light source. Quantum dot imaging was performed using a Qdot-specific filter cube and plasmonic-fluor was imaged using standard Cy5 filter.

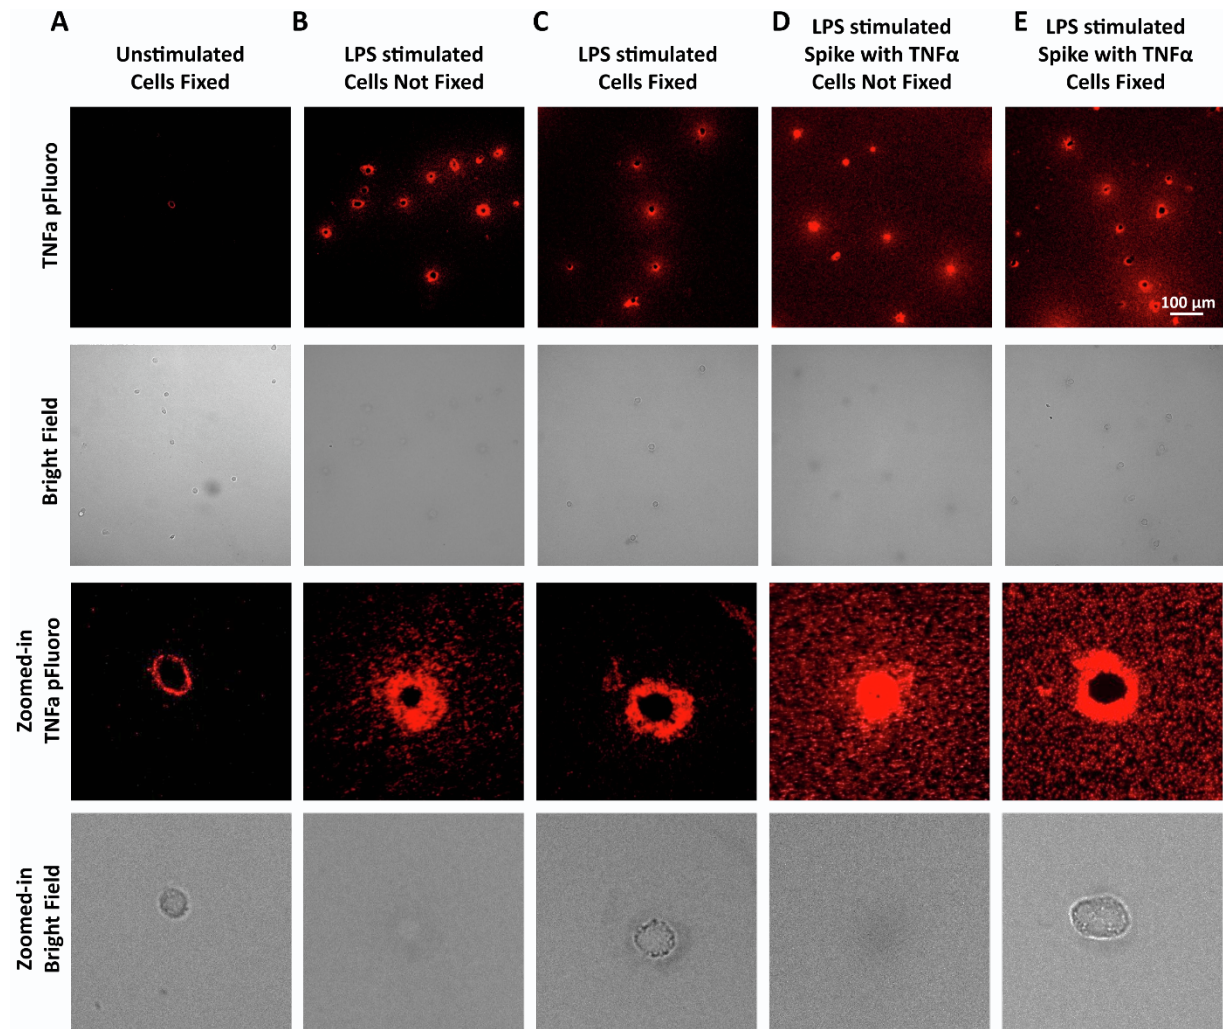

**Figure S3: Studying the secretion of TNF $\alpha$  beneath the cell body. Related to Figure 1.** JAWS II DCs were treated with 200 ng/ml lipopolysachharide (LPS). FluoroDOT images (top panel) of cells secreting TNF $\alpha$  and the corresponding bright field images (bottom panel).

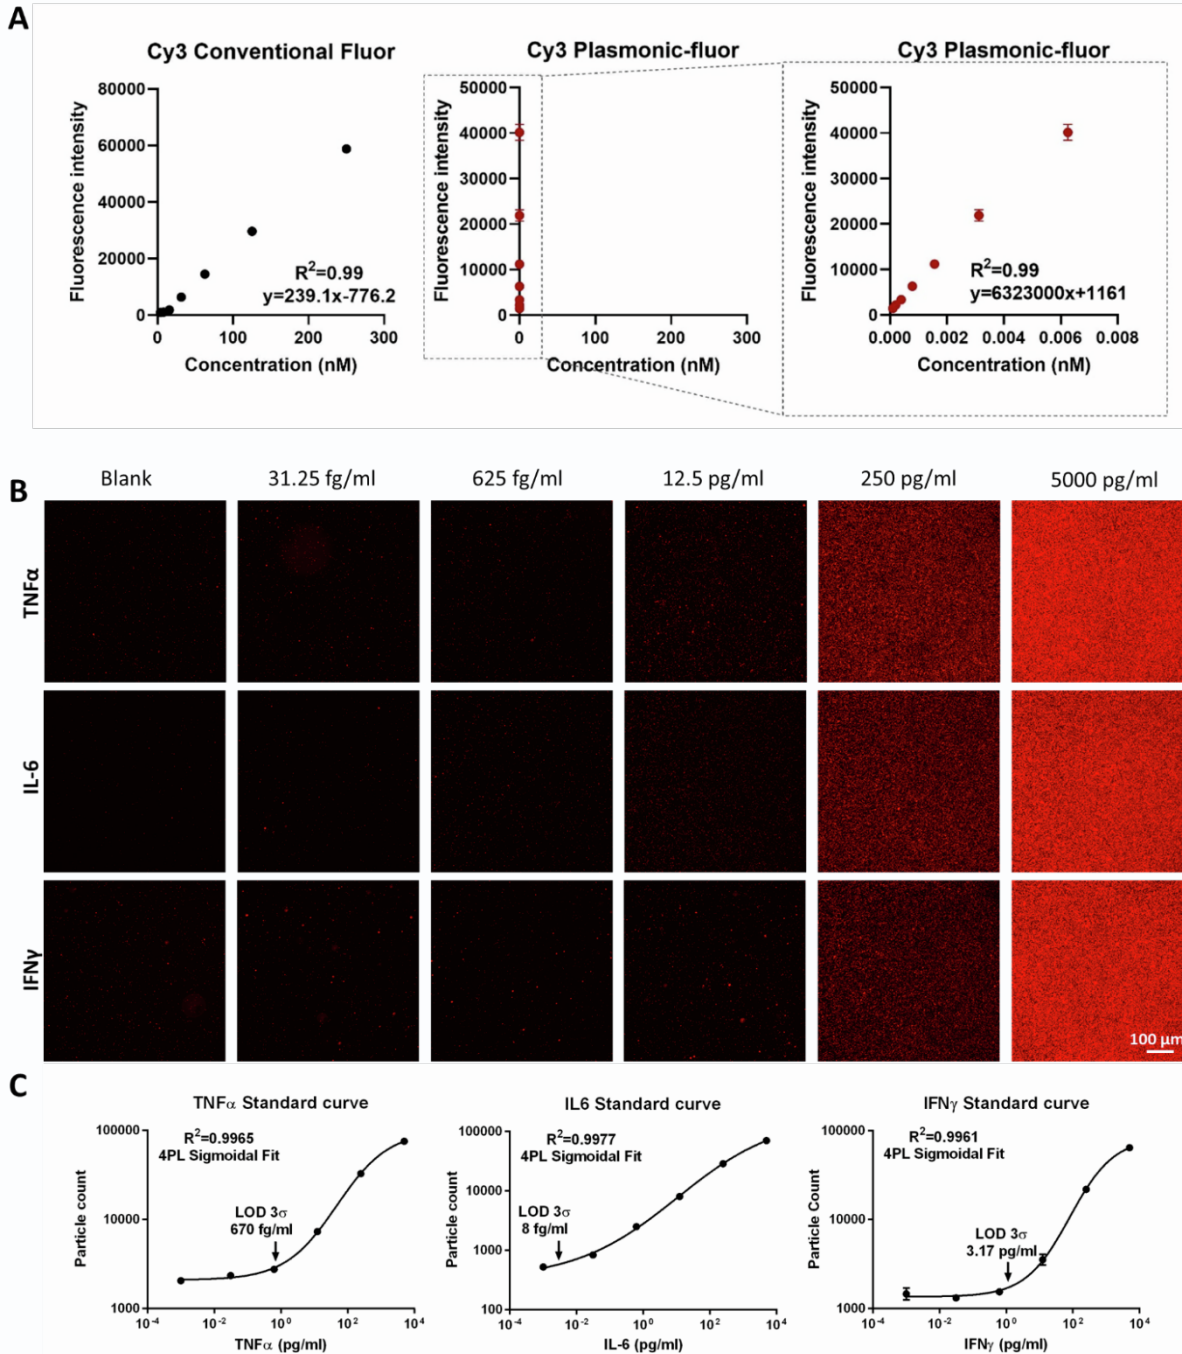

**Figure S4: Comparison of brightness of conventional fluorophore and plasmonic-fluor and standard curves using plasmon-enhanced fluorescence-linked immunosorbent assay. Related to Figure 2.** A) Fluorescence intensity of Cy3-conventional fluor and Cy3-plasmonic-fluor at their different molar concentrations. Data represented as mean  $\pm$  s.d. ( $n = 2$  repeated tests). B) Density-dose dependence images demonstrating increasing density of plasmonic-fluors with increasing concentration of cytokine TNF $\alpha$ , IL-6 and IFN $\gamma$ , scale bar: 100  $\mu$ m and C) standard curves for the plasmon-enhanced fluorescence-linked immunosorbent assay (p-FLISA) for TNF $\alpha$ , IL-6 and IFN $\gamma$ . The data was fit using 4-parameter logistic (4 PL) sigmoidal curve. Limit of detection (LOD) is defined as (mean+3 $\sigma$ ) of the blank.

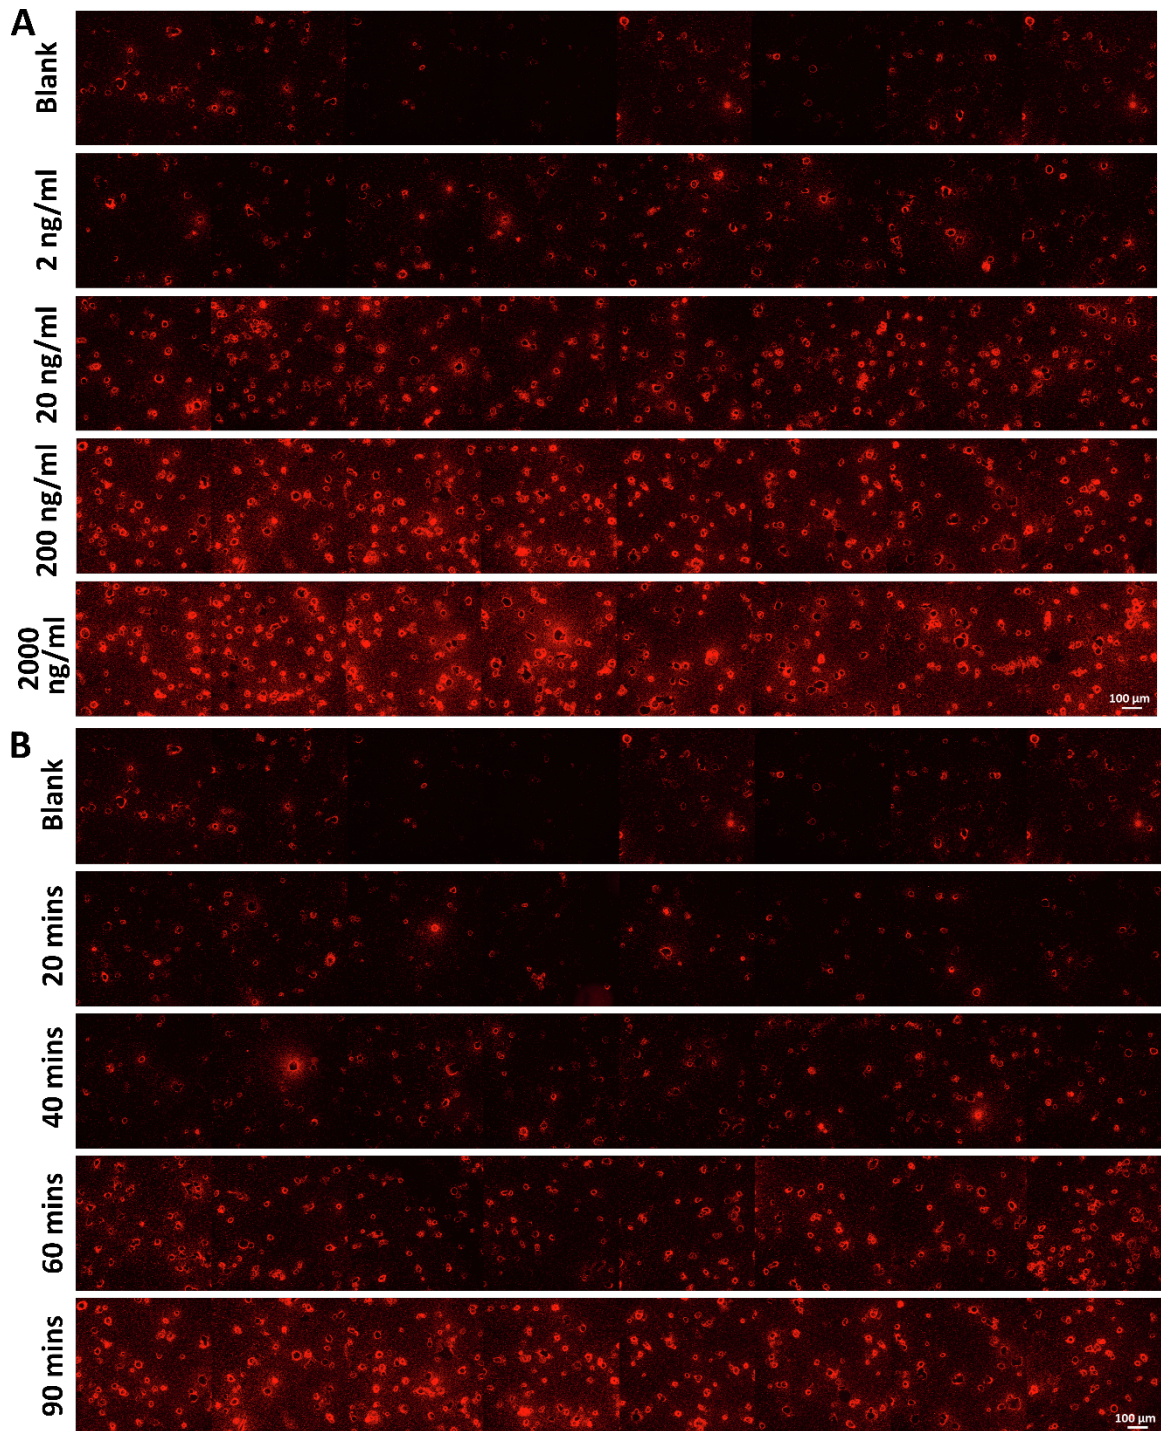

**Figure S5: TNF- $\alpha$  FluoroDOT assay performed on JAWS II DCs. Related to Figure 3.** JAWS II DCs treated with A) 0, 2, 20, 200, and 2000 ng/ml LPS for 90 minutes and B) 200 ng/ml of LPS treated for 20 minutes, 40 minutes, 60 minutes, and 90 minutes. Cy5 epifluorescence microscopy images of the assay using Cy5-plasmonic-fluor. Each panel contains eight representative 20x images stitched together. Scale bar: 100  $\mu$ m.



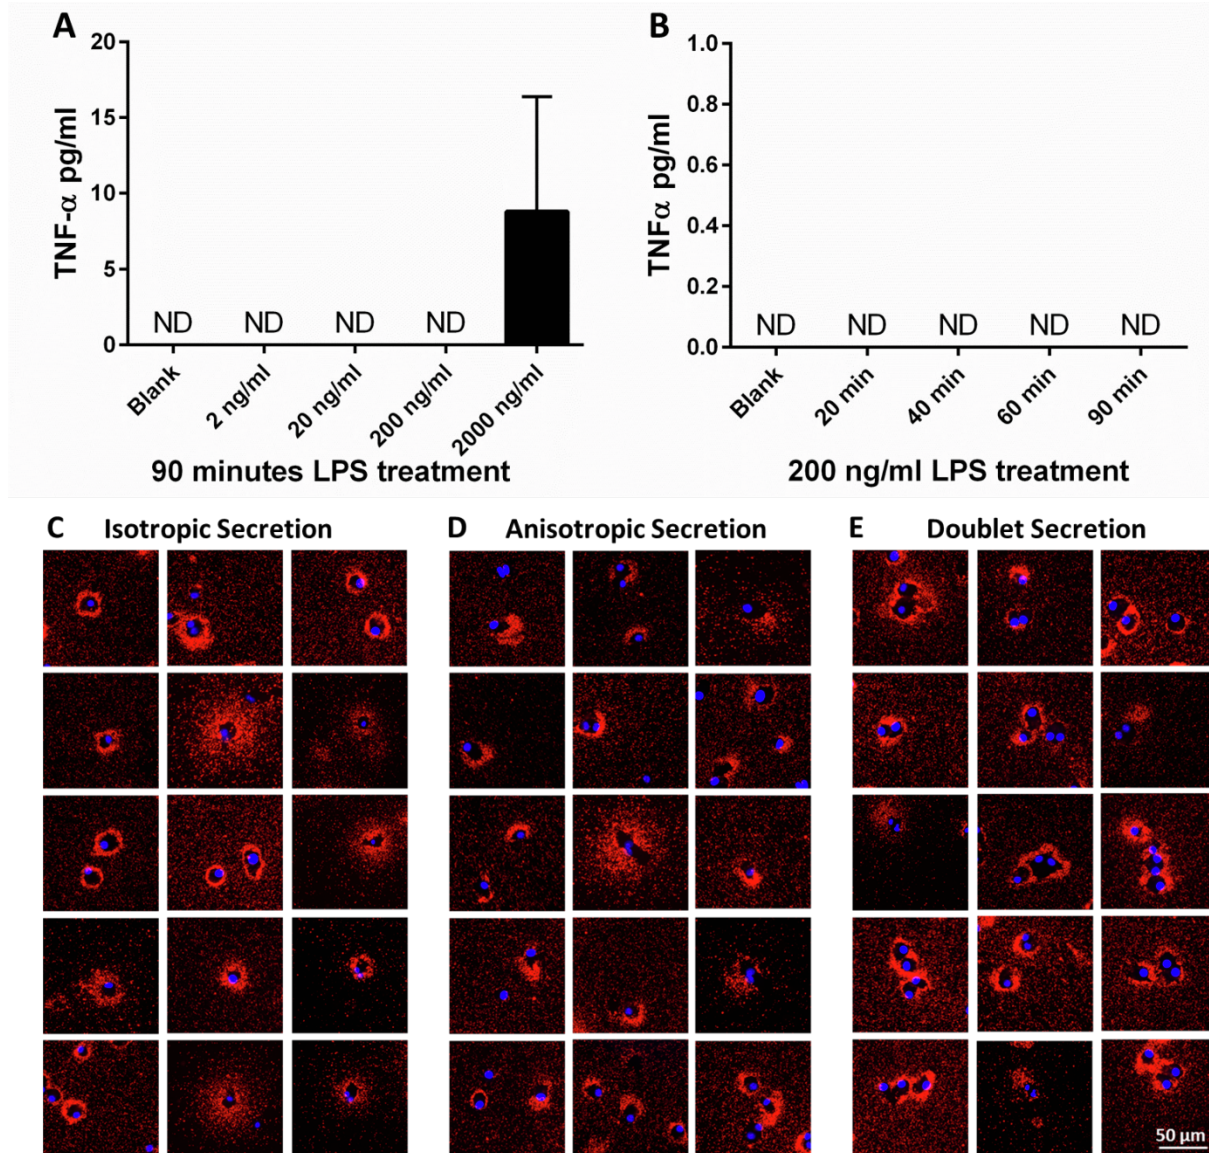

**Figure S6: Cytokine levels insupernatant as detected by ELISA and spatial distribution of secretions by FluoroDOT assay. Related to Figure 3.** TNF- $\alpha$  secretion analyzed by ELISA of the supernatant of JAWS II DCs after stimulation of LPS for A) 90 minutes with 0, 2, 20, 200 and 2000 ng/ml and B) 20, 40, 60, and 90 minutes with 200 ng/ml, n=2. Representative Cy5 (red) and DAPI (blue) merged images revealing details of TNF $\alpha$  secretion for C) isotropic secretion, D) anisotropic secretion, and E) secretion by two cells in proximity (doublet secretion). Scale bare: 50  $\mu$ m.

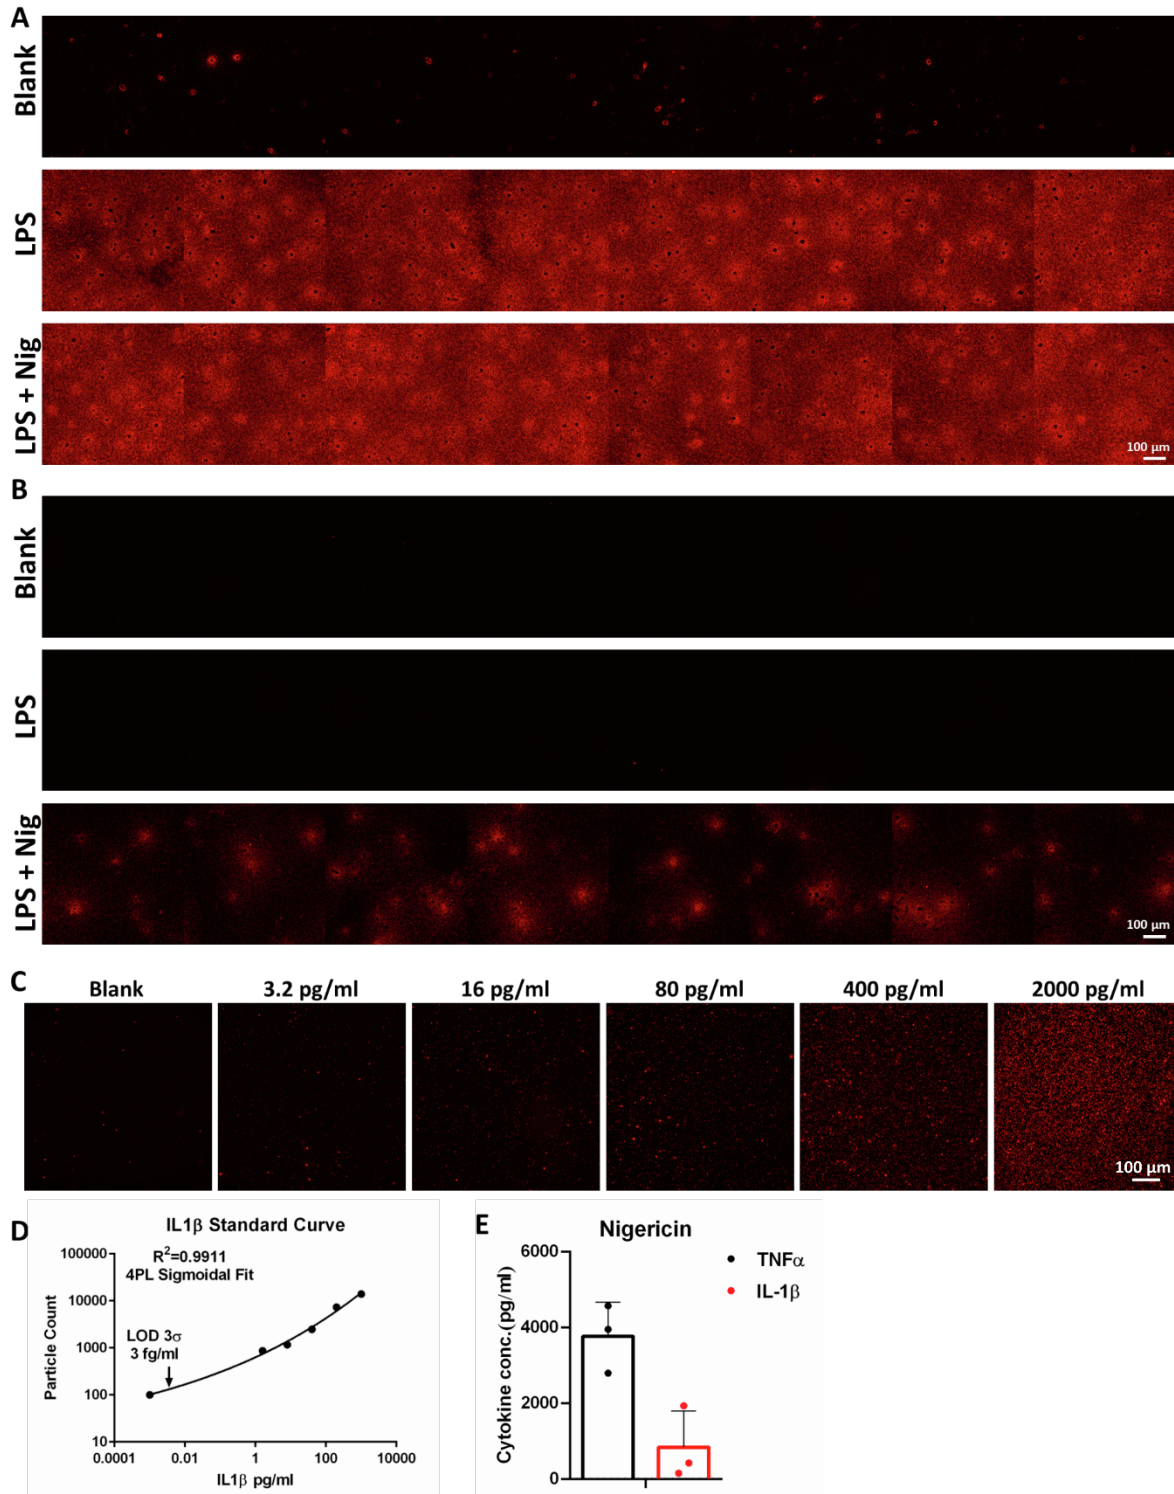

**Figure S7: FluoroDOT assay on murine alveolar macrophages. Related to Figure 4.** Murine alveolar macrophages treated with 500 ng/ml LPS with and without 20  $\mu$ M nigericin. A) TNF $\alpha$  secretion and B) IL-1 $\beta$  secretion observed after 4 hours of LPS treatment and 30 minutes of nigericin treatment. Cy5 epifluorescence microscopy images of the assay using Cy5-plasmonic-fluor. Each panel contains eight representative 20x images stitched together. Scale bar: 100  $\mu$ m. C) Density-dose dependence images demonstrating increasing density of plasmonic-fluors with increasing concentration of IL1 $\beta$ , scale bar: 100

$\mu\text{m}$  and D) standard curve for the plasmon-enhanced fluorescence-linked immunosorbent assay (p-FLISA) for IL1 $\beta$ . E) TNF $\alpha$  and IL1 $\beta$  secretion analyzed by ELISA of the supernatant of alveolar macrophages after stimulation by LPS for 4 hours and nigericin for 30 minutes. The data was fit using a 4-parameter logistic (4 PL) sigmoidal curve. Limit of detection (LOD) is defined as (mean+3  $\sigma$ ) of the blank.

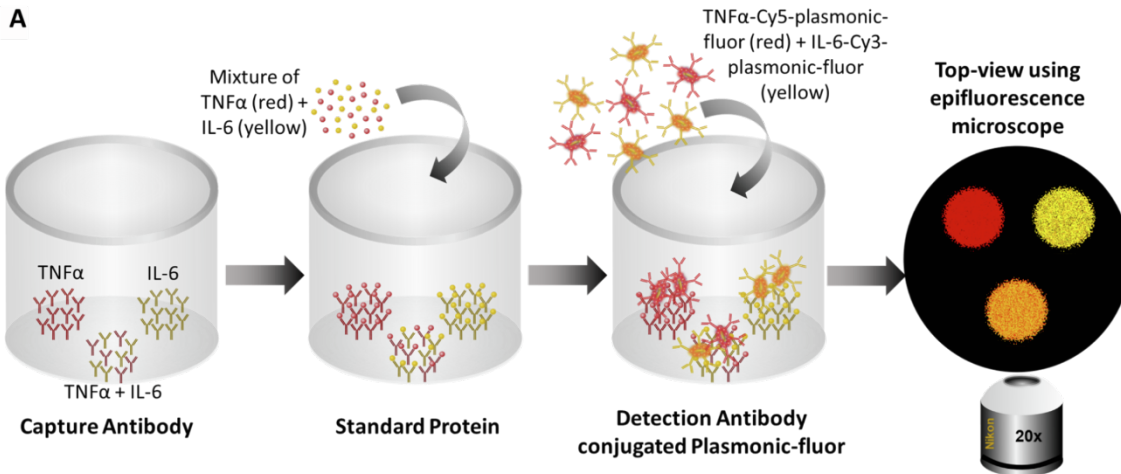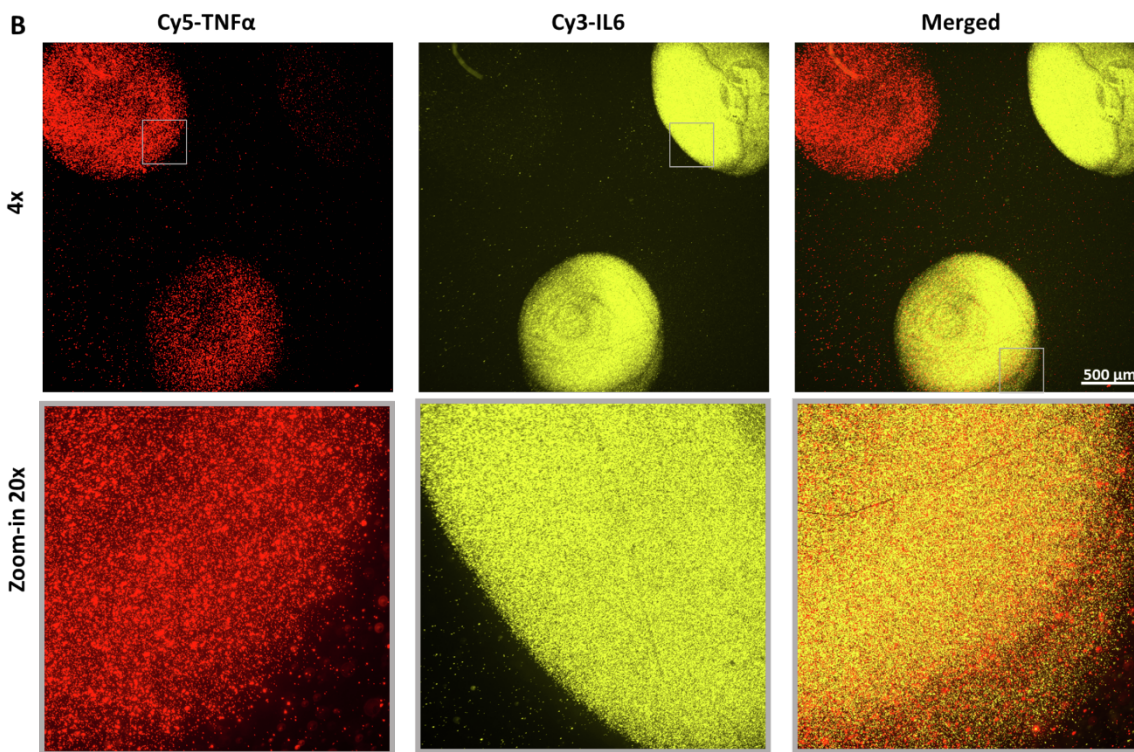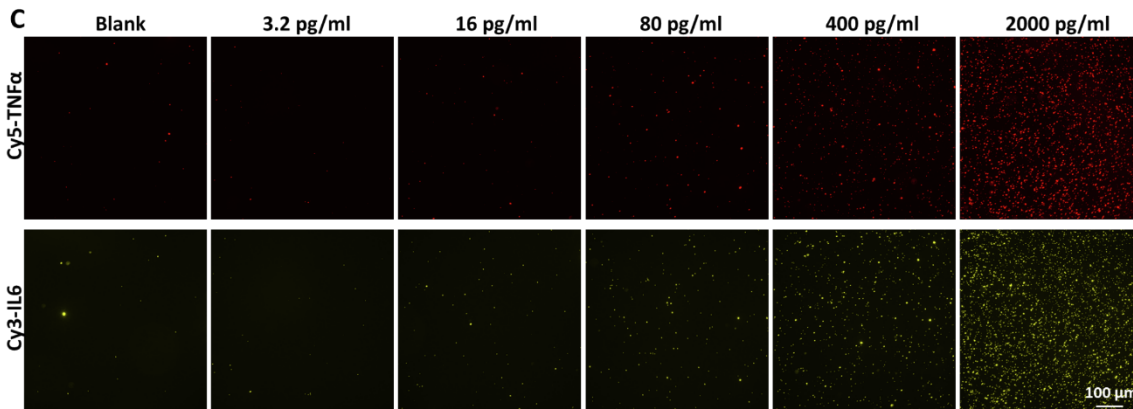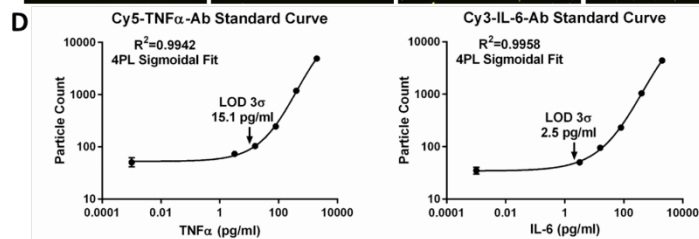

**Figure S8: Multiplexed FluoroDOT assay. Related to Figure 5.** A) Schematic illustration depicting the step-by-step method used for validation of specificity of antibody-conjugated plasmonic-fluor by spotting capture antibodies of both cytokines (TNF $\alpha$  and IL-6) in the same well of a microtiter plate. B) Epifluorescence images of antibody-conjugated plasmonic fluors for their respective cytokine: TNF $\alpha$  (top-left) and IL-6 (top-right) and both TNF $\alpha$  and IL-6 (bottom-middle). The top images were collected using a 4x objective, and the grey-boxes shown in 4x images were taken using the 20x objective, as shown below. C) Density-dose dependence images demonstrating increasing density of plasmonic-fluors with increasing concentration of cytokine TNF $\alpha$ , IL-6 in a multiplexed assay, scale bar: 100  $\mu$ m and D) standard curve for the multiplexed plasmon-enhanced fluorescence-linked immunosorbent assay (p-FLISA) for TNF $\alpha$  and IL-6. The data was fit using a 4-parameter logistic (4 PL) sigmoidal curve. Limit of detection (LOD) is defined as (mean+3  $\sigma$ ) of the blank.

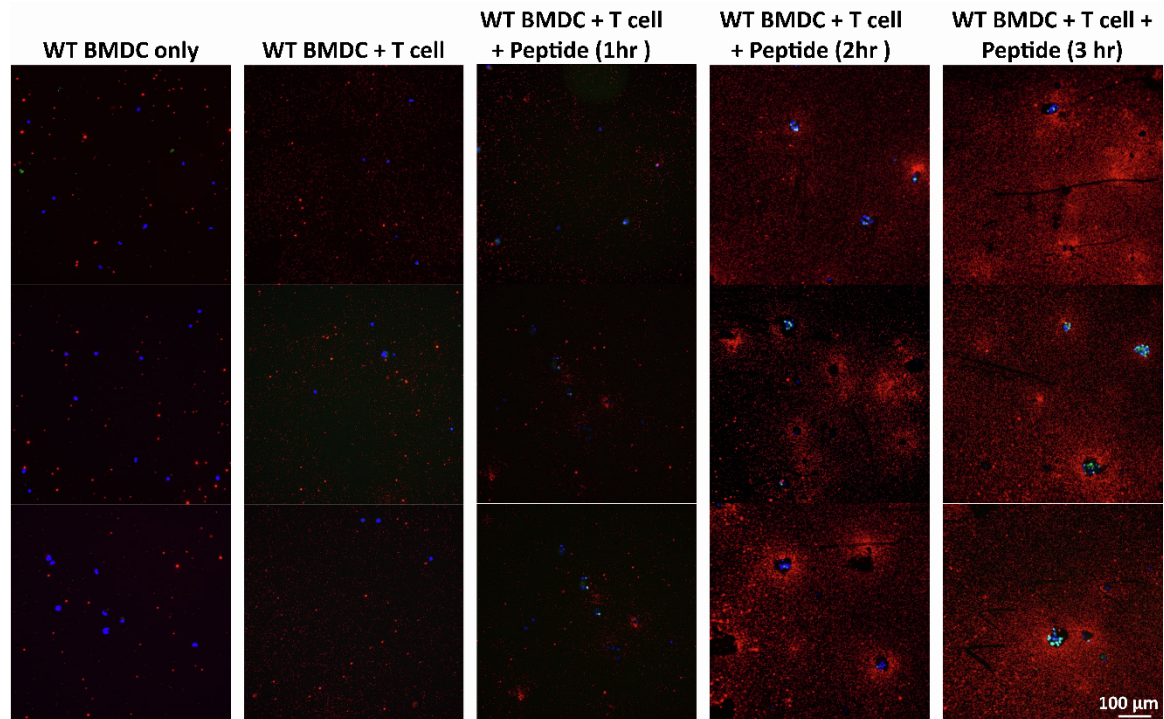

**Figure S9: Fluorodot assay using co-cultures. Related to Figure 7.** IFN $\gamma$  secretion by mycobacterium tuberculosis (*Mtb*) MHCII-peptide (P25)-specific CD4<sup>+</sup> T cells when co-cultured with BMDCs for 1 hour, 2 hours, and 3 hours. Cy5 (red) epifluorescence microscopy images of the cells using Cy5-plasmonic-fluor. Each panel contains three representative 20x images stitched together depicting co-cultures of BMDCs and T cells (DAPI staining nuclei) along with GFP expression (green) triggered in activated CD4<sup>+</sup> T cells. Scale bar: 100  $\mu$ m.

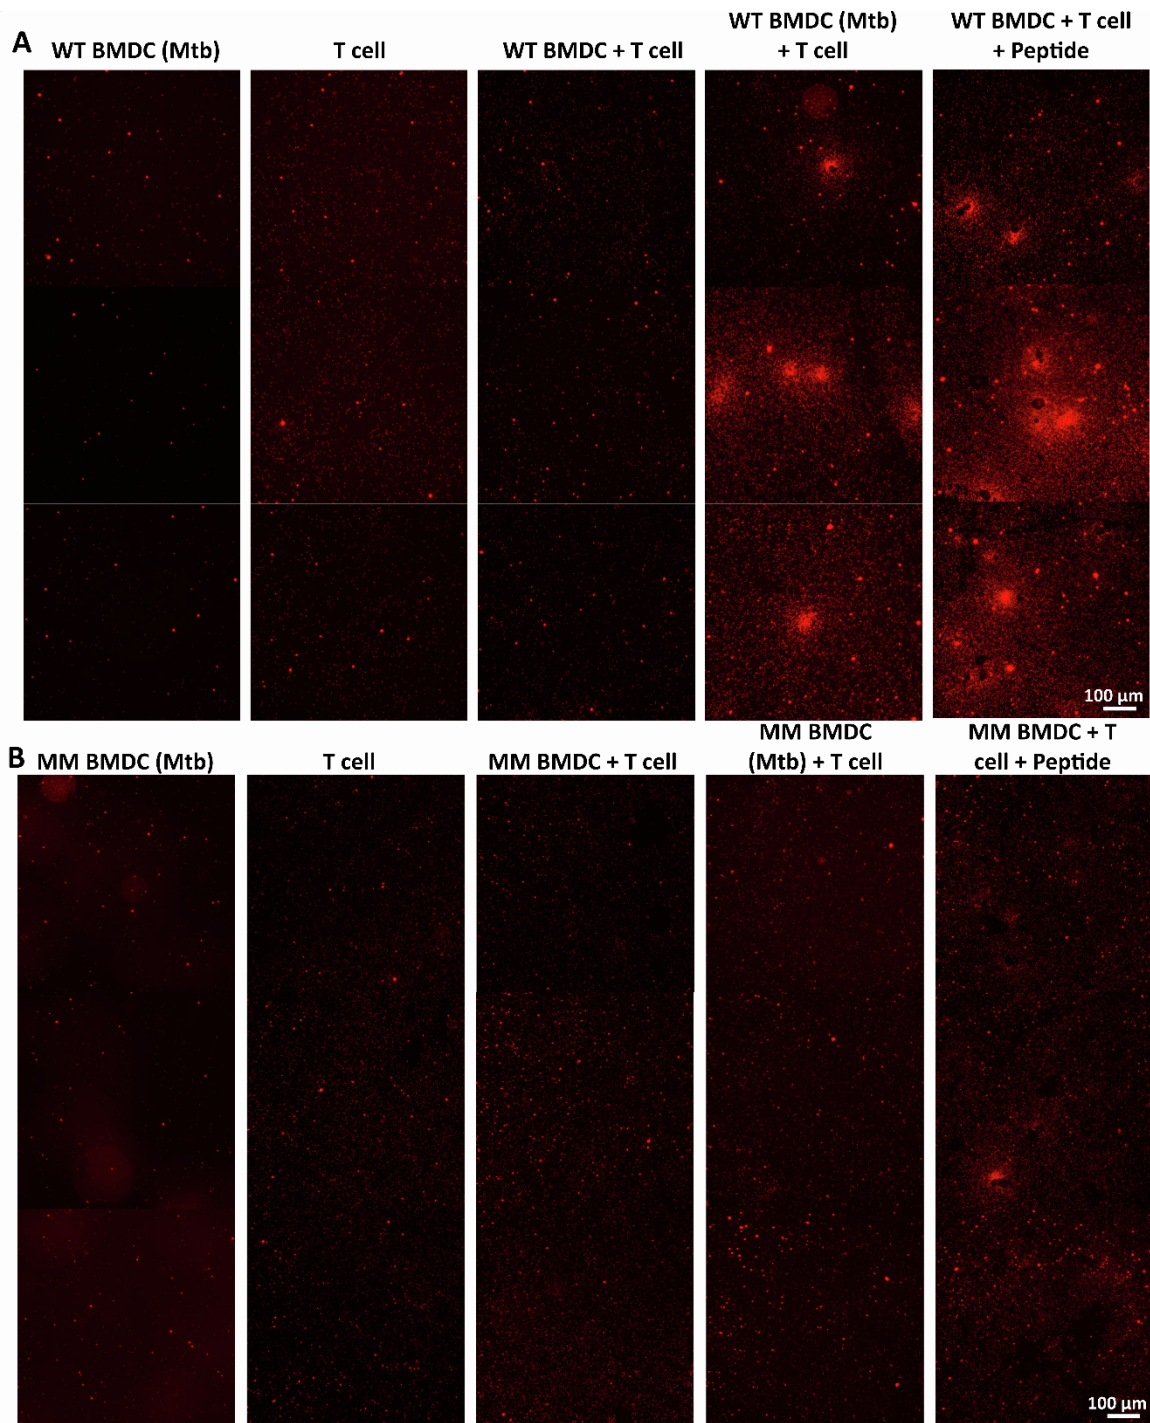

**Figure S10: FluoroDOT assay using wild-type and mismatched BMDCs in co-cultures. Related to Figure 7.** A) IFN $\gamma$  secretion by mycobacterium tuberculosis (*Mtb*) MHCII-peptide-specific T cells when co-cultured with a) Wild-type (WT) BMDCs infected with *Mtb* and B) Mismatched (MM) BMDCs infected with *Mtb*. Cy5 epifluorescence microscopy images of the cells using Cy5-plasmonic-fluor. Each panel contains three representative 20x images stitched together. Scale bar: 100  $\mu$ m.
